# Supplementary material
Source: Elsevier journal article supplement (https://cris.unibo.it/retrieve/ce340656-1402-4754-95f6-bcc46406f4ab/mmc1.pdf)
Supplement: mmc1 [file mmc1.pdf]

Cell Reports, Volume 45

## Supplemental information

### Differential translocation of bacteriophages across the intestinal barrier in health and Crohn's disease

Clara Douadi, Quentin Lamy-Besnier, Ilias Theodorou, Olivier Schiettekatte, Yanis Sbardella, Loïc Brot, Paolo Emidio Costantini, Roberto Saporetti, Alberto Danielli, Matteo Calvaresi, Marianne De Paepe, Harry Sokol, Diego Garcia-Weber, Véronique Carrière, Sophie Thenet, and Luisa De Sordi

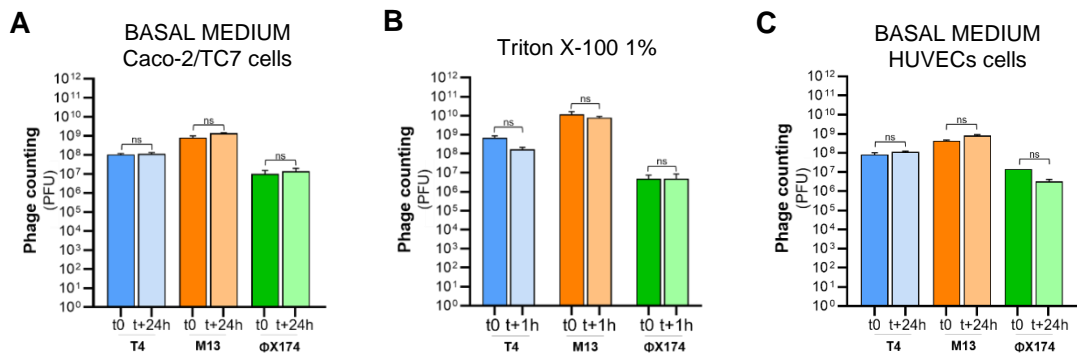

**Figure S1 : Cell culture medium and Triton X-100 do not impact phage viability**

**(A)** Titration of T4, M13, and ΦX174 phages immediately after suspension (t0) and 24 h after incubation in Caco-2/TC7 culture medium. **(B)** Titration of T4, M13, and ΦX174 phages immediately after suspension (t0) and following a 1 h incubation with 1% Triton X-100 (t+1h), used in this study to lyse eukaryotic cells. **(C)** Titration of T4, M13, and ΦX174 phages immediately after suspension (t0) and 24 h after incubation in HUVEC culture medium (t+24h). All experiments were performed in triplicates [n = 3]. Data are represented as mean ± SEM.

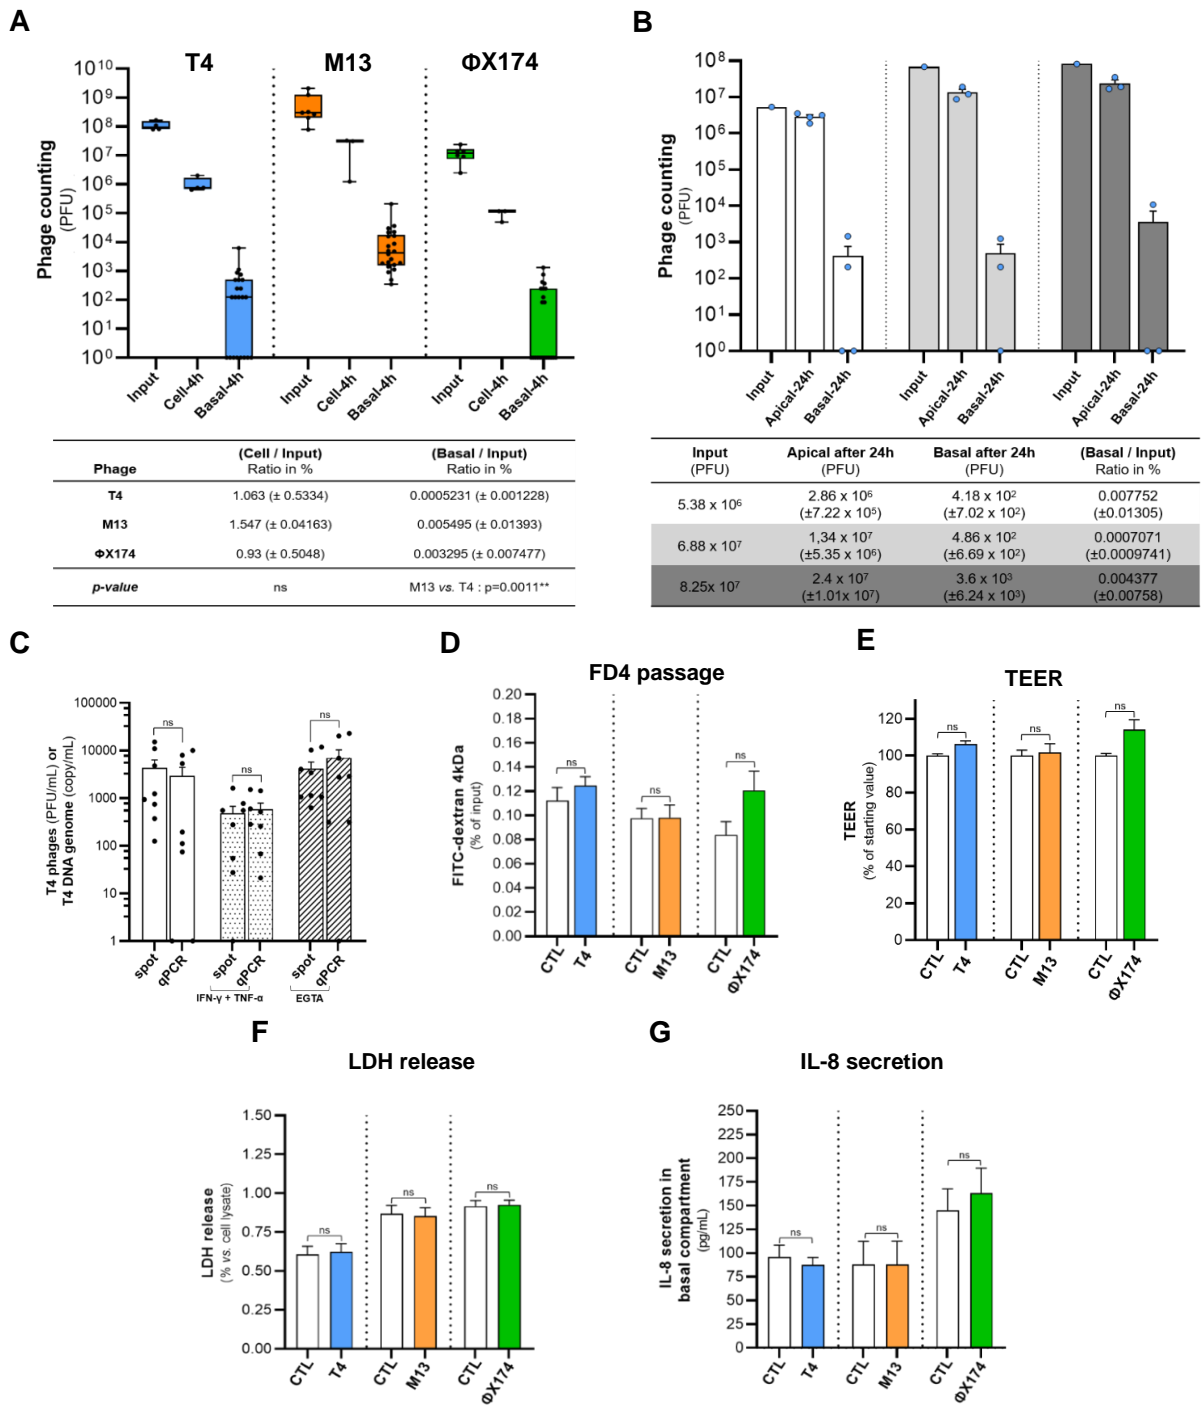

**Figure S2 : Internalization, translocation and functionality of phages crossing Caco-2/TC7 intestinal epithelial cells and absence of impact on permeability, cytotoxicity, or inflammation (legend on following page)**

**Figure S2 : Internalization, translocation and functionality of phages crossing Caco-2/TC7 intestinal epithelial cells and absence of impact on permeability, cytotoxicity, or inflammation**

**(A)** Titration of T4, M13, and  $\Phi$ X174 phages associated to Caco-2/TC7 cells (cell) and translocated phages (basal) after 4 h of incubation in the apical compartment. The input refers to the phages initially added to the apical compartment. The table displays the percentage of phages associated to and translocated across Caco-2/TC7, calculated relative to the input. A minimum of four independent experiments [ $n \geq 4$ ] were performed. **(B)** Titration of T4 phages in the apical and basal compartments after 24 h of incubation following their addition to the apical compartment. The input refers to the number of phages initially added to the apical compartment. The table shows the initial input of T4 phages, the number of phages recovered from both the apical and basal compartments after 24 h, and the percentage of phages translocating across the Caco-2/TC7 monolayer, calculated relative to the input. One independent experiment was conducted in triplicate or quadruplicate. **(C)** Titration of T4 phages in the basal compartment after 24 h of apical incubation, measured by plaque assays (spot) and qPCR (a calibration curve using T4 DNA was used to determine the genome copy/mL) under both physiological, or compromised barrier conditions (IFN- $\gamma$  + TNF- $\alpha$ , and EGTA). Two independent experiments were conducted in quadruplicate. **(D)** FITC-Dextran 4 kDa (FD4) passage from the apical to the basal compartment during 24 h in the presence of the indicated phage compared to control (CTL) condition without phage. **(E)** Measure of transepithelial electrical resistance (TEER) after 24 h of incubation with medium containing no phages (CTL) or the indicated phages. Values are expressed as a percentage relative to the starting value for each well and then normalized to the control condition. **(F)** Release of lactate dehydrogenase (LDH) by the cells in the apical compartment, after 24 h of incubation with medium containing no phages (CTL) or the indicated phages. Values are expressed as the percentage of LDH measured in the whole cell lysate. **(G)** Secretion of pro-inflammatory cytokine IL-8 by the cells within the basal compartment after 24 h of incubation with medium containing no phages (CTL) or the indicated phages. For all the experiments, a minimum of four independent experiments [ $n \geq 4$ ] were performed. All data are represented as mean  $\pm$  SEM.

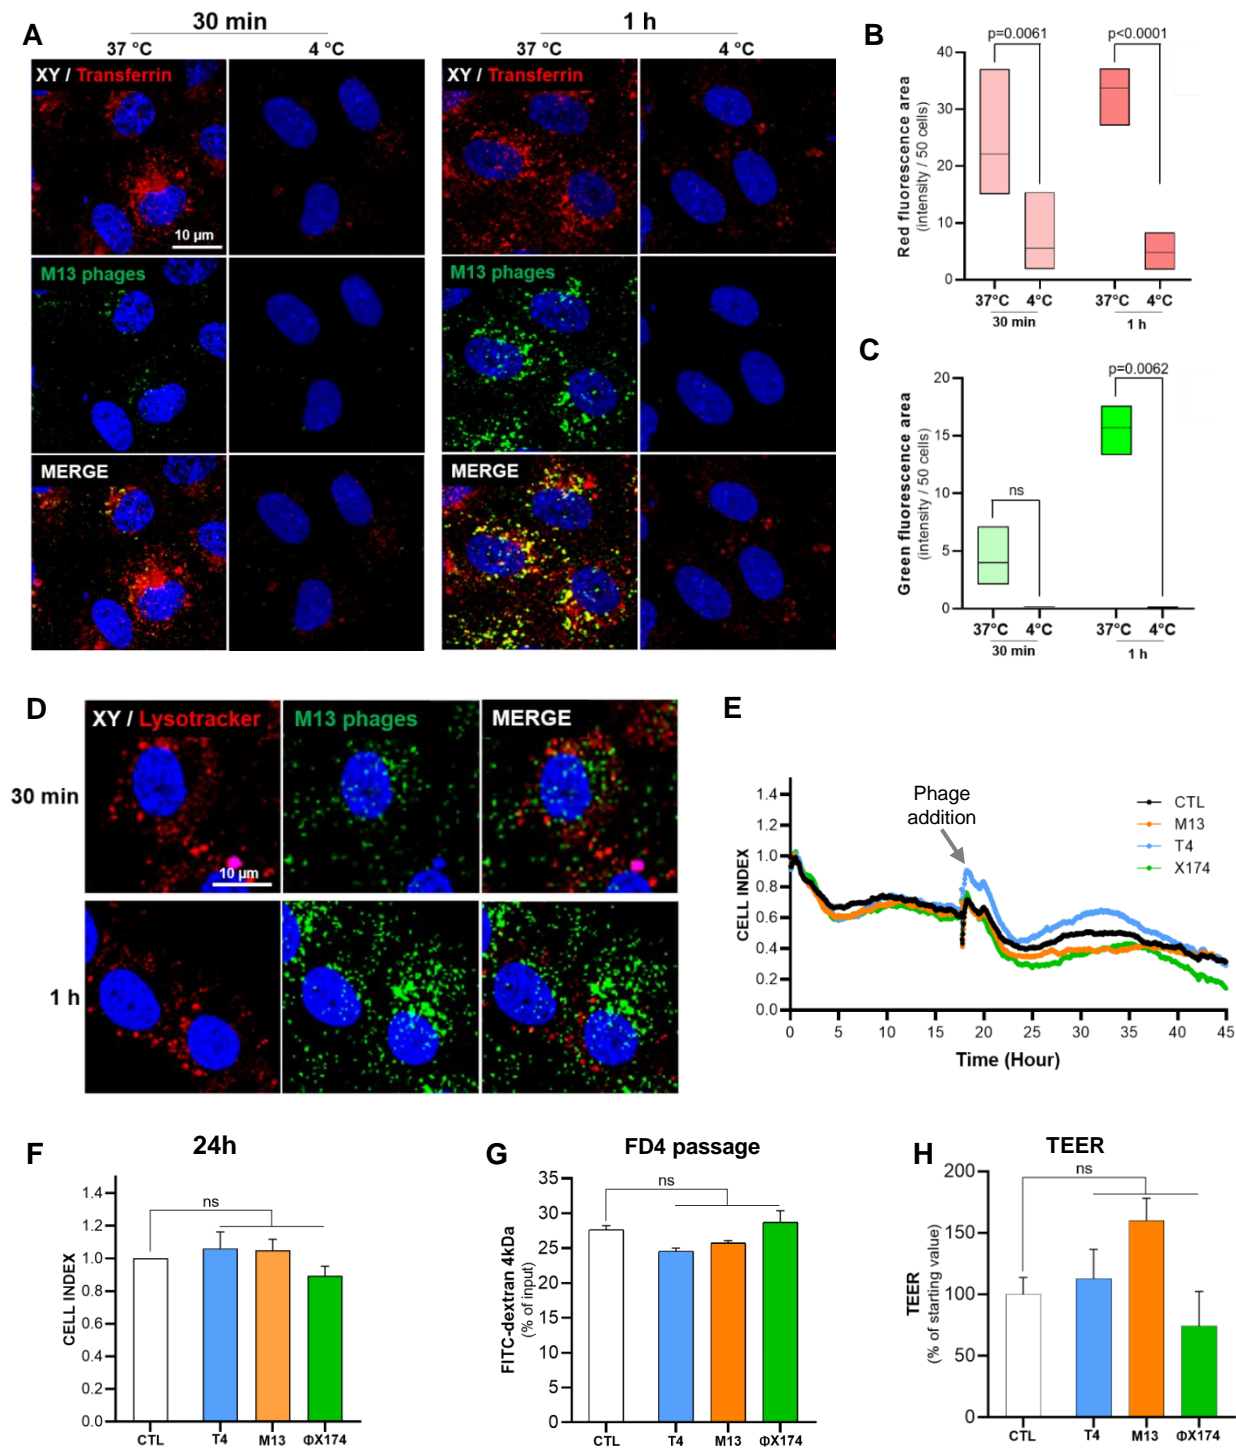

**Figure S3 : Visualization of phages in the endocytic pathway in HUVECs cells following short incubation periods and phage impact on cellular permeability**

**(A)** Images of CF488-labeled M13 phages and Cy3-labeled transferrin in HUVECs after 30 min and 1 h, at 37°C, and 4°C. Quantification of the **(B)** red fluorescence area (transferrin), and **(C)** green fluorescence area (M13 phages) in HUVECs following 30 min and 1 h, at 37°C, and 4°C, as shown in panel (A). Data represent mean values obtained from analysis of 5 randomly selected images. **(D)** Images of CF488-labeled M13 phages and LysoTracker Deep Red in HUVECs after 30 min and 1 h. For A and D: scale bar, 10  $\mu$ m. **(E)** Representative plot of real-time permeability (cell index) of HUVECs in presence of the indicated phage relative to control (CTL) condition using xCELLigence system. **(F)** Cell index values obtained after 24 h in presence of the indicated phage relative to control (CTL) condition without phage after real time measure of HUVECs permeability, shown in panel (E). **(G)** FITC-Dextran 4 kDa (FD4) passage from the apical to the basal compartment after 24 h in presence of the indicated phage relative to control (CTL) condition. **(H)** Measure of transendothelial electrical resistance (TEER) after 24 h of incubation with medium containing no phages (CTL) or the indicated phages. Values are expressed as the percentage relative to the starting value for each well and then normalized to the control condition. For (E) to (H), three independent experiments [n=3] were performed. Data are represented as mean  $\pm$  SEM.

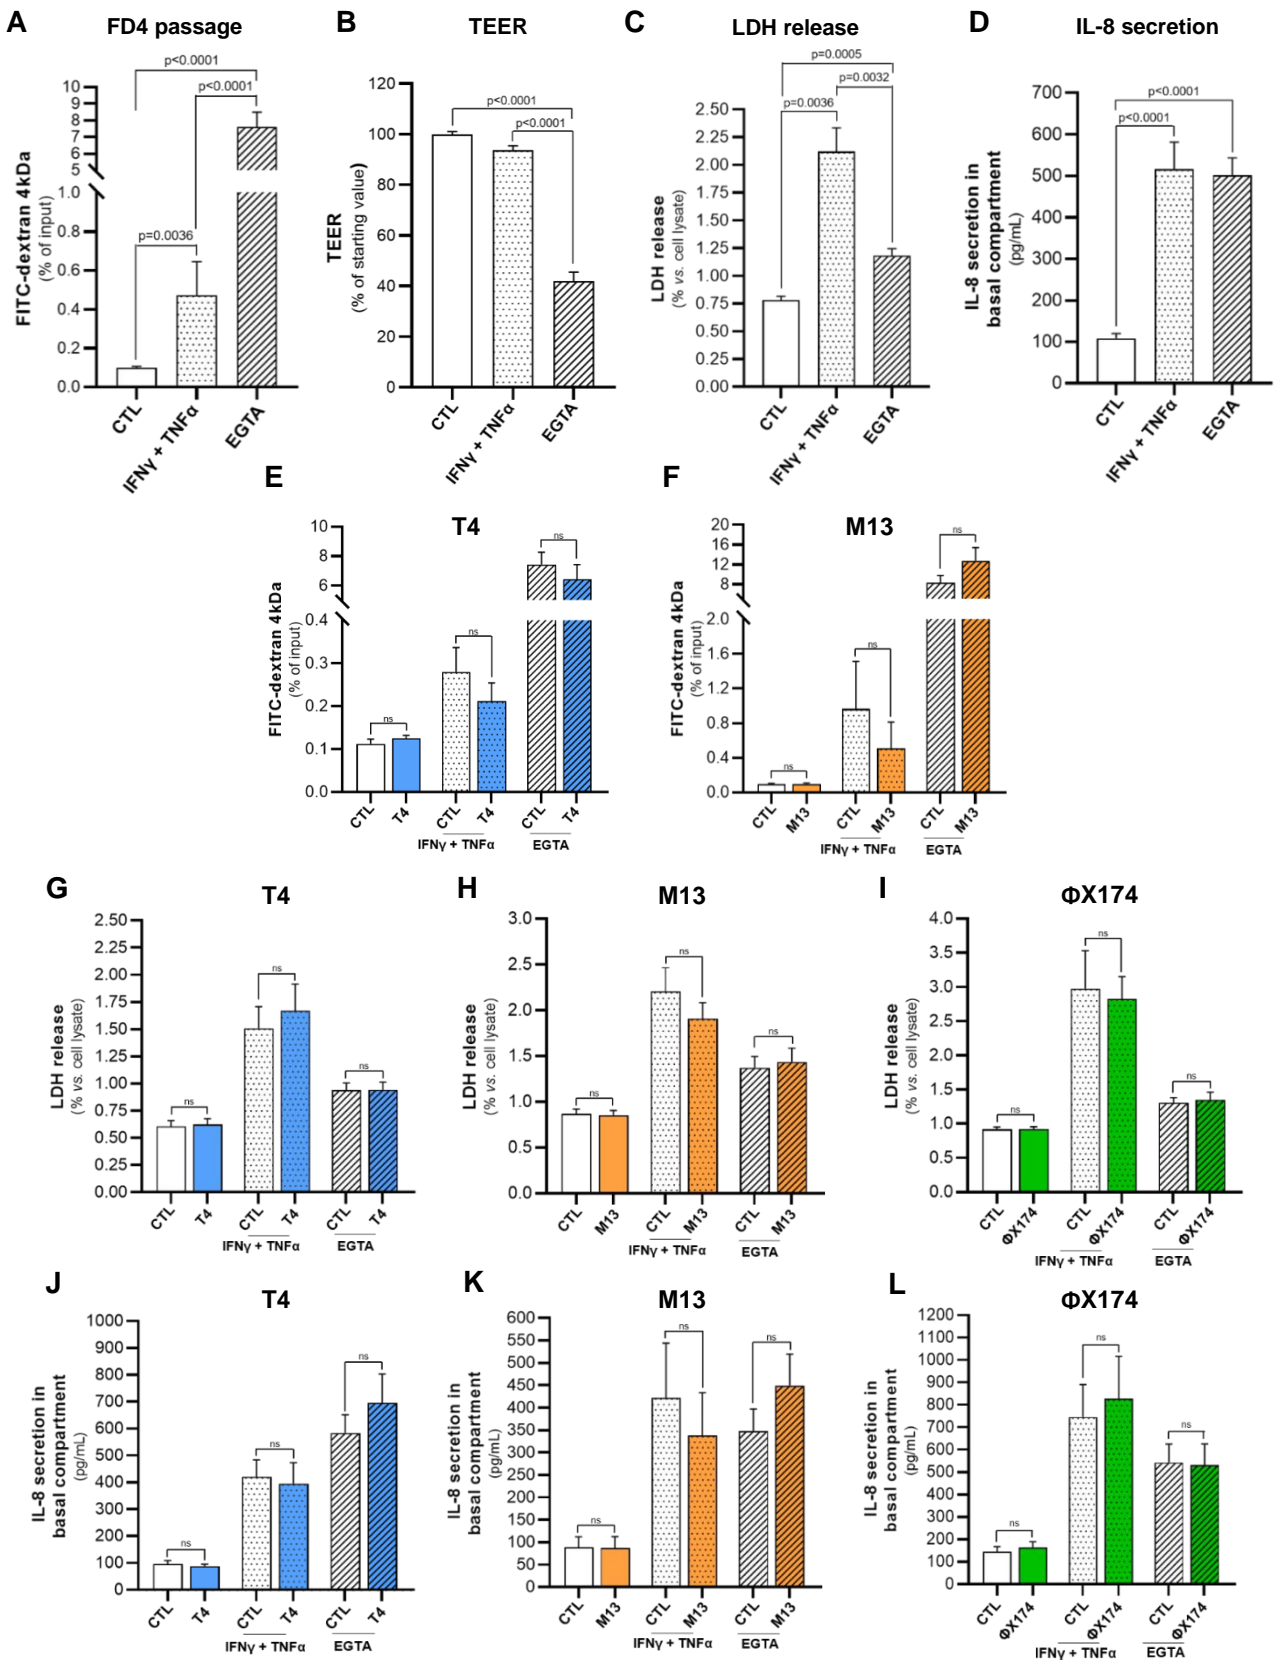

Figure S4 : Phages do not induce hyperpermeability, cytotoxicity, or inflammation in Caco-2/TC7 cells under compromised barrier conditions (legend on following page)

**Figure S4 : Phages do not induce hyperpermeability, cytotoxicity, or inflammation in Caco-2/TC7 cells under compromised barrier conditions**

Caco-2/TC7 were treated with IFN $\gamma$  + TNF $\alpha$  in the basal compartment during 48 h, or with EGTA in the apical compartment during 26 h. **(A)** FITC-Dextran 4 kDa (FD4) passage from the apical to the basal compartment (24 h of FD4 flux). **(B)** Measure of transepithelial electrical resistance (TEER). Values are expressed as a percentage relative to the starting value for each well and then normalized to the control condition. **(C)** Release of lactate dehydrogenase (LDH) from cells (expressed as the percentage of LDH measured in the whole cell lysate). **(D)** Secretion of pro-inflammatory cytokine IL-8 by the cells into the basal compartment. For (A) to (D), these data were pooled from control groups used in independent experiments involving T4, M13, and  $\Phi$ X174 phages, with at least 3 independent experiments conducted for each [n  $\geq$  9]. Data are represented as mean  $\pm$  SEM. **(E-F)** FITC-Dextran 4 kDa (FD4) passage from the apical to the basal compartment during 24 h in presence of **(E)** T4, or **(F)** M13 phages relative to control (CTL) condition, under healthy, and compromised barrier conditions (IFN $\gamma$  + TNF $\alpha$ , or EGTA). **(G-I)** Release of lactate dehydrogenase (LDH) from cells after 24 h in presence of **(G)** T4, **(H)** M13, or **(I)**  $\Phi$ X174 phages relative to control (CTL) condition, under healthy, and compromised barrier conditions (IFN $\gamma$  + TNF $\alpha$ , or EGTA). **(J-L)** Secretion of pro-inflammatory cytokine IL-8 by the cells into the basal compartment after 24 h in presence of **(J)** T4, **(K)** M13, or **(L)**  $\Phi$ X174 phages relative to control (CTL) condition, under healthy, and compromised barrier conditions (IFN $\gamma$  + TNF $\alpha$ , or EGTA). For (E) to (L), a minimum of three independent experiments [n  $\geq$  3] were performed. Data are represented as mean  $\pm$  SEM.

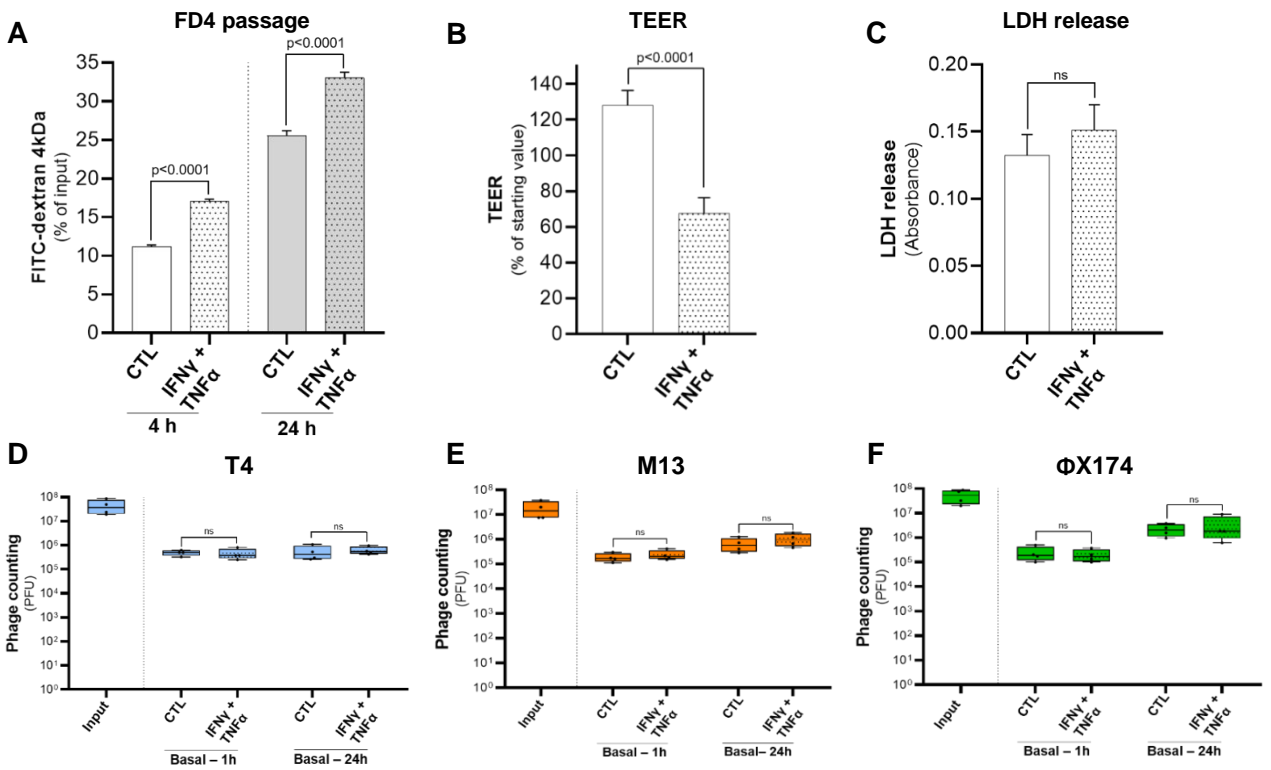

**Figure S5 : Phage translocation is not impacted by inflammatory condition in HUVECs cells**

(A) FITC-Dextran 4 kDa (FD4) passage from the apical to the basal compartment after 22 h (4 h of FD4 flux), and 42 h (4 h of FD4 flux) of IFN $\gamma$  + TNF $\alpha$  treatment. (B) Measure of transendothelial electrical resistance (TEER) after 18 h of IFN $\gamma$  + TNF $\alpha$  treatment. Values are expressed as a percentage relative to the starting value for each well and then normalized to the control condition. (C) Release of lactate dehydrogenase (LDH) from cells after 42 h of IFN $\gamma$  + TNF $\alpha$  treatment. For (A), (B), (C), experiments were pooled from control groups used in independent experiments involving T4, M13, and ΦX174 phages [n = 9]. (D-F) Titration of (D) T4, (E) M13, and (F) ΦX174 phages in the basal compartment (basal) after 24 h of incubation. The input represents the phages added in the apical compartment at the beginning of the experiment. Conditions include healthy barrier condition (CTL) relative to compromised barriers conditions induced by IFN $\gamma$  and TNF $\alpha$ . For (D), (E), (F), three independent experiments [n = 3] were performed. Data are represented as mean  $\pm$  SEM.

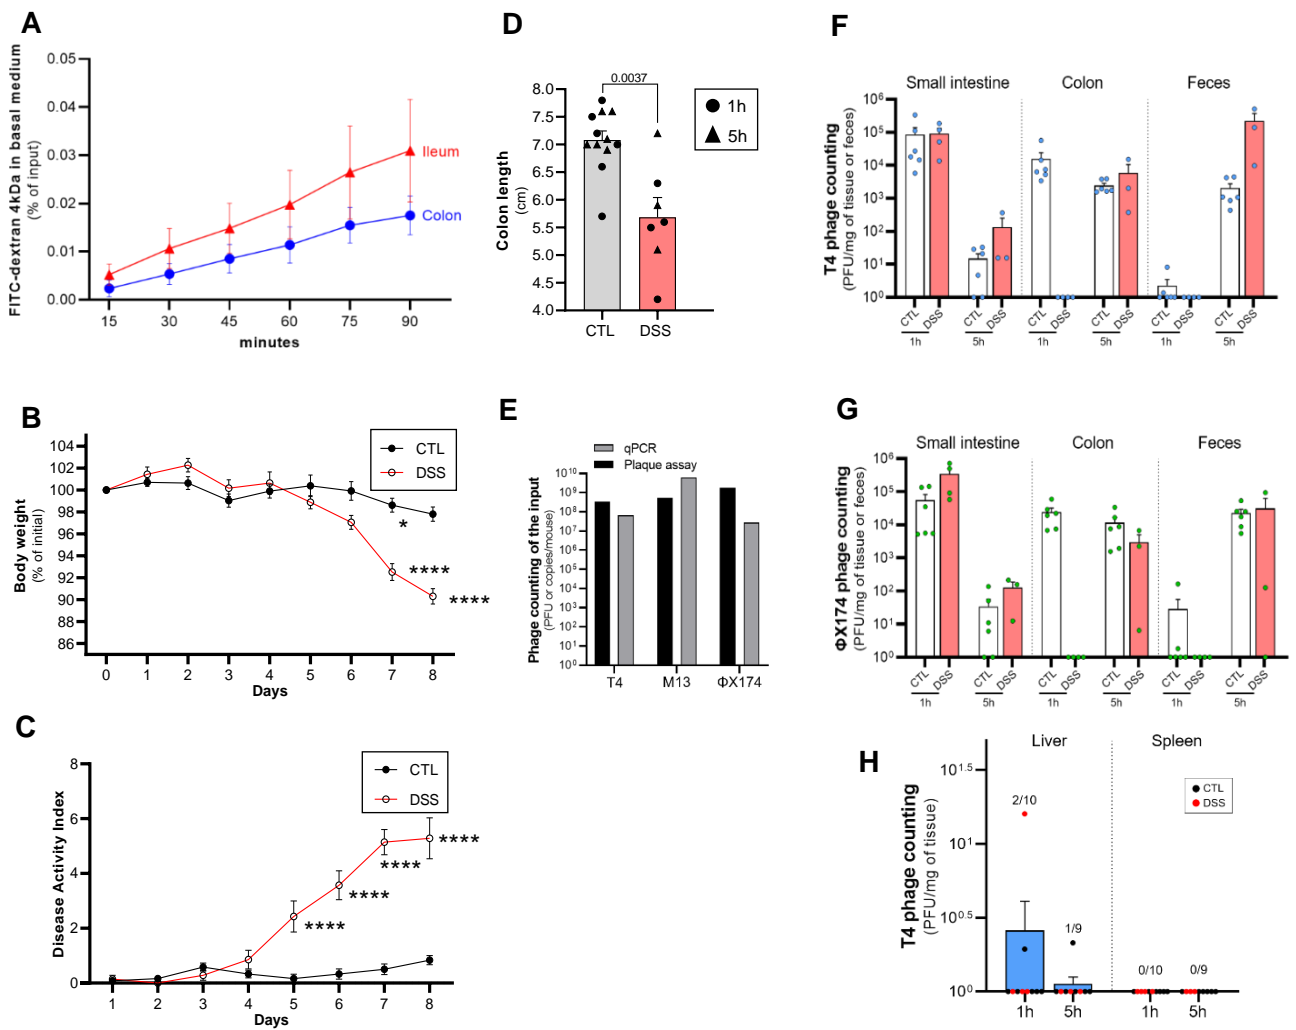

**Figure S6 : Phage translocation in mice models**

(A) Level of FITC-Dextran 4kDa (FD4) in basal medium over 90 min for ileum (red curve) and colon (blue curve) tissues from healthy mice in the *ex vivo* Ussing chamber model. For each intestinal segment, six replicates were performed. Data are represented as the percentage of fluorescent tracer added in the apical chamber over time and as mean  $\pm$  SEM. (B) Bodyweight changes in control and DSS-treated mice throughout the *in vivo* experiment. (C) Disease Activity Index (DAI) scores in control and DSS-treated mice. (D) Colon length measured at day 9 in both groups. Symbols indicate the mice sacrificed either 1 h (circles) or 5 h (triangles) after phage cocktail oral gavage. (E) Titration of T4, M13 and  $\Phi$ X174 phages in the input sample by plaque assays and qPCR. (F-G) Titration of T4 (F) or  $\Phi$ X174 (G) phages in the small intestine, colon and feces of control and DSS-treated mice at 1h and 5 h post-oral administration. (H) Titration of T4 phages in the liver and spleen of control and DSS-treated mice, 1h and 5 h after oral administration. Numbers indicate mice positive for phage detection out of the total tested. Phage quantification in (F), (G) and (H) was performed by plaque assays. Data are represented as mean  $\pm$  SEM ; n = 6 mice per control group (1h and 5h post-gavage) and n = 3 or 4 mice per DSS-treated group (1h and 5h post-gavage).

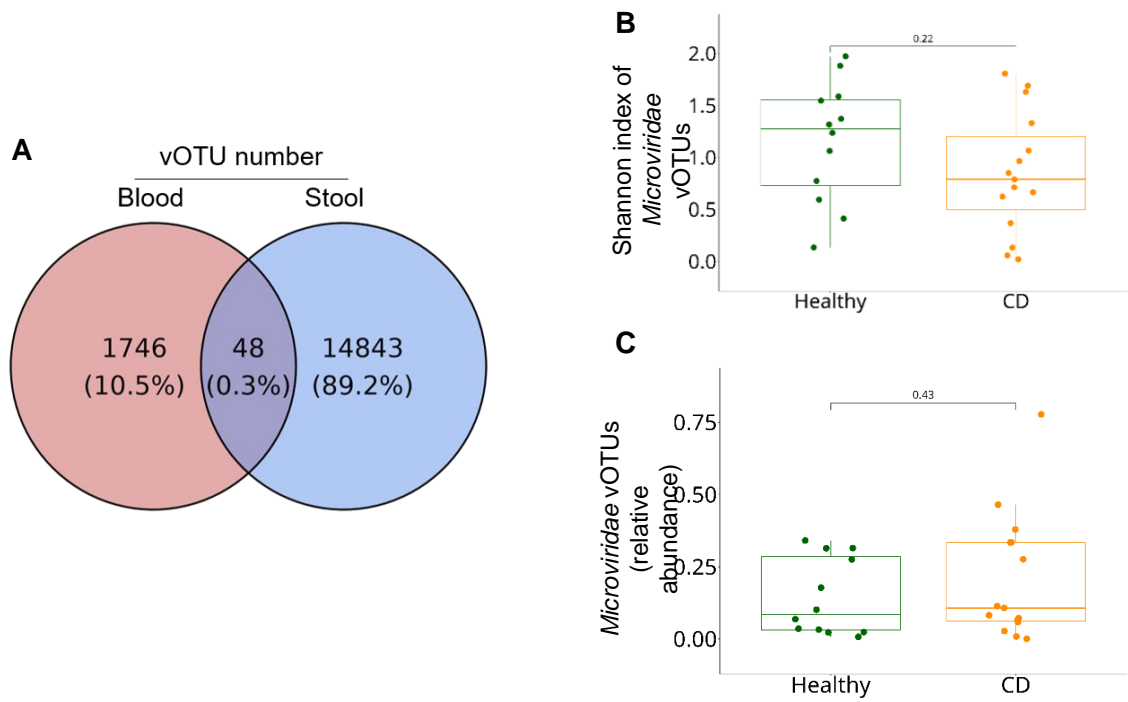

**Figure S7 : vOTUs identified in blood and fecal samples from all participants and analysis of fecal *Microviridae*.**

**(A)** Venn diagram of the vOTUs identified in blood and fecal samples from all participants. The final vOTU dataset was obtained by excluding all sequences detected in the negative controls and retaining only those present in at least one biological sample across the 29 participants in the cohort. **(B)** Alpha diversity of *Microviridae* in fecal samples, quantified using Shannon index, and compared between patients with Crohn's disease (CD) and healthy subjects. **(C)** Overall relative abundance of *Microviridae* vOTUs in fecal samples, separated by disease status.

**Table S1 : Phages do not induce hyperpermeability of Caco-2/TC7 cells in compromised barrier conditions.**

Measure of transepithelial electrical resistance (TEER) after 24 h of incubation with medium containing no phages (CTL), or the indicated phages, under healthy, and compromised barrier conditions (IFN $\gamma$  + TNF $\alpha$  or EGTA treatment). A minimum of three independent experiments [ $n \geq 3$ ] were performed. Values are expressed as a percentage relative to the starting value for each well, and then compared to the control condition.

| TEER (% of starting value)                             |                         |                         |                         |                         |                         |                         |
|--------------------------------------------------------|-------------------------|-------------------------|-------------------------|-------------------------|-------------------------|-------------------------|
|                                                        | CTL                     | T4                      | CTL                     | M13                     | CTL                     | $\Phi$ X174             |
|                                                        | 100<br>( $\pm$ 3.643)   | 106.2<br>( $\pm$ 6.758) | 100<br>( $\pm$ 9.452)   | 101.7<br>( $\pm$ 14.86) | 100<br>( $\pm$ 3.649)   | 114.3<br>( $\pm$ 14.49) |
| <i>p-value</i>                                         | p>0.99                  |                         | p>0.99                  |                         | p>0.99                  |                         |
| <b>IFN<math>\gamma</math> + TNF<math>\alpha</math></b> | 97.27<br>( $\pm$ 7.581) | 105.8<br>( $\pm$ 16.78) | 90.77<br>( $\pm$ 10.82) | 89.99<br>( $\pm$ 7.991) | 91.35<br>( $\pm$ 10.91) | 92.82<br>( $\pm$ 7.656) |
| <i>p-value</i>                                         | p>0.99                  |                         | p>0.99                  |                         | p>0.99                  |                         |
| <b>EGTA</b>                                            | 48.04<br>( $\pm$ 13.02) | 58.29<br>( $\pm$ 20.81) | 31.06<br>( $\pm$ 16.16) | 22.72<br>( $\pm$ 11.42) | 45.9<br>( $\pm$ 28.30)  | 46.80<br>( $\pm$ 30.25) |
| <i>p-value</i>                                         | p>0.99                  |                         | p>0.99                  |                         | p>0.99                  |                         |

**Table S2 : Percentage of translocated phages across intestinal tissue in healthy mice.**

Percentage of phages that translocated after 90 min of addition in the apical compartment using the Ussing chamber system, calculated relative to the input. For each phage, three ileum and colon tissue samples taken from two or three individual mice were analyzed.

| <b>Phage</b>                 | <b>Ileum<br/>(Basal / Input)<br/>Ratio in %</b> | <b>Colon<br/>(Basal / Input)<br/>Ratio in %</b> |
|------------------------------|-------------------------------------------------|-------------------------------------------------|
| <b>T4</b>                    | 0.0008730 ( $\pm$ 0.001496)                     | 0.0004333 ( $\pm$ 0.0005859)                    |
| <b>M13</b>                   | 9.348e-005 ( $\pm$ 0.0001615)                   | 1.207e-005 ( $\pm$ 0.00001987)                  |
| <b><math>\Phi</math>X174</b> | 0.0004167 ( $\pm$ 0.0007217)                    | 0                                               |
| <b><i>p-value</i></b>        | ns                                              | ns                                              |

**Table S3 : Detailed information about the participants included in the study.**

“CD” indicates patient with Crohn’s disease and “H” indicates healthy subject

| Participant | Sampling date | Sex    | Age | Age at diagnosis | Localisation (Montreal) | Flare/ Remission | C-reactive protein (mg/L) | Harvey-Bradshaw Index | Smoking | Surgery | Antibiotic (last month) | Undergoing treatment |
|-------------|---------------|--------|-----|------------------|-------------------------|------------------|---------------------------|-----------------------|---------|---------|-------------------------|----------------------|
| CD1         | 2020          | Female | 53  | 37               | L2                      | Remission        | 1                         | 2                     | Past    | No      | No                      | Yes                  |
| CD2         | 2020          | Female | 40  | NA               | E3                      | Remission        | 1                         | NA                    | Past    | No      | No                      | No                   |
| CD3         | 2020          | Female | 38  | NA               | L3L4                    | Flare            | 1                         | 4                     | Never   | No      | No                      | No                   |
| CD4         | 2020          | Male   | 44  | NA               | L3L4                    | Remission        | 0.6                       | 1                     | Never   | No      | No                      | No                   |
| CD5         | 2020          | Female | 40  | 20               | L3                      | Remission        | 5                         | 2                     | Past    | No      | No                      | Yes                  |
| CD6         | 2020          | Male   | 60  | 55               | L3                      | Flare            | 5                         | 7                     | Never   | No      | No                      | Yes                  |
| CD7         | 2019          | Female | 26  | 16               | L3                      | Flare            | 89.9                      | NA                    | Past    | No      | No                      | No                   |
| CD8         | 2020          | Male   | 42  | 13               | L3                      | Flare            | 6.3                       | 3                     | Never   | No      | No                      | Yes                  |
| CD9         | 2020          | Male   | 47  | 12               | L2                      | Remission        | 7.8                       | 0                     | Past    | No      | No                      | No                   |
| CD10        | 2018          | Female | 50  | 47               | L1                      | Remission        | 1                         | NA                    | Current | No      | No                      | Yes                  |
| CD11        | 2020          | Female | 33  | 19               | L3                      | Flare            | 5.3                       | NA                    | Past    | No      | No                      | No                   |
| CD12        | 2020          | Male   | 22  | 20               | L3                      | Remission        | 5                         | 3                     | Never   | No      | No                      | Yes                  |
| CD13        | 2020          | Male   | 56  | 52               | L1                      | Flare            | 8.7                       | 7                     | Past    | No      | No                      | Yes                  |
| CD14        | 2020          | Female | 56  | 20               | L3                      | Remission        | 1                         | 2                     | Never   | No      | No                      | Yes                  |
| CD15        | 2020          | Female | 37  | 27               | L3                      | Flare            | 1                         | 7                     | Past    | No      | No                      | No                   |
| H1          | 2020          | Female | 26  | NA               | NA                      | NA               | NA                        | NA                    | Never   | No      | No                      | No                   |
| H2          | 2020          | Female | 28  | NA               | NA                      | NA               | NA                        | NA                    | Never   | No      | No                      | No                   |
| H3          | 2020          | Male   | 31  | NA               | NA                      | NA               | NA                        | NA                    | Never   | No      | No                      | No                   |
| H4          | 2020          | Male   | 29  | NA               | NA                      | NA               | NA                        | NA                    | Never   | No      | No                      | No                   |
| H5          | 2020          | Male   | 36  | NA               | NA                      | NA               | NA                        | NA                    | Never   | No      | No                      | No                   |
| H6          | 2021          | Female | 25  | NA               | NA                      | NA               | NA                        | NA                    | Current | No      | No                      | No                   |
| H7          | 2021          | Male   | 32  | NA               | NA                      | NA               | NA                        | NA                    | Never   | No      | No                      | No                   |
| H8          | 2021          | Female | 38  | NA               | NA                      | NA               | NA                        | NA                    | Current | No      | No                      | No                   |
| H9          | 2021          | Female | 27  | NA               | NA                      | NA               | NA                        | NA                    | Never   | No      | No                      | No                   |
| H10         | 2021          | Female | 29  | NA               | NA                      | NA               | NA                        | NA                    | Never   | No      | No                      | No                   |
| H11         | 2021          | Female | 56  | NA               | NA                      | NA               | NA                        | NA                    | Never   | No      | No                      | No                   |
| H12         | 2021          | Female | 41  | NA               | NA                      | NA               | NA                        | NA                    | Never   | No      | No                      | No                   |
| H13         | 2021          | Female | 28  | NA               | NA                      | NA               | NA                        | NA                    | Never   | No      | No                      | No                   |
| H14         | 2021          | Female | 55  | NA               | NA                      | NA               | NA                        | NA                    | Never   | No      | No                      | No                   |

**Table S4. Characteristics of the 16 vOTUs detected both in fecal and blood samples retrieved from the same subject (shared blood/fecal vOTUs).**

“CD” indicates patient with Crohn’s disease and “HS” indicates healthy subject.

“NA” indicates values that could not be assigned. Phages encoding an integrase in their genome were classified as temperate, while those lacking an integrase were considered virulent, excepted for *Microviridae* that were excluded from this analysis.

| Name of the vOTUs             | Family                   | Lifestyle | Host Phylum    | Homology with known gut viruses | Participant |
|-------------------------------|--------------------------|-----------|----------------|---------------------------------|-------------|
| SampleCD8_<br>Contig922       | NA                       | Virulent  | Bacillota      | Yes                             | CD          |
| SampleH14_<br>Contig702       | NA                       | Temperate | Bacteroidota   | Yes                             | CD          |
| SampleCD11_<br>Contig2059     | <i>Anelloviridae</i>     | Virulent  | NA             | Yes                             | CD          |
| SampleCD11_<br>Contig727      | <i>Microviridae</i>      | NA        | NA             | Yes                             | CD          |
| CrossAssembly_<br>Contig15411 | <i>Microviridae</i>      | NA        | Bacillota      | Yes                             | CD          |
| SampleH2_<br>Contig566        | NA                       | Virulent  | Bacteroidota   | Yes                             | CD          |
| SampleH14_<br>Contig1913      | NA                       | Temperate | Bacillota      | Yes                             | HS          |
| SampleH1_<br>Contig1177       | NA                       | Virulent  | NA             | Yes                             | HS          |
| SampleH13_<br>Contig1617      | NA                       | Virulent  | Bacillota      | No                              | HS          |
| SampleCD2_<br>Contig30        | <i>Suoliviridae</i>      | Virulent  | NA             | Yes                             | CD          |
| SampleCD2_<br>Contig5485      | NA                       | Virulent  | NA             | Yes                             | CD          |
| CrossAssembly_<br>Contig3237  | <i>Autographiviridae</i> | Virulent  | Pseudomonadota | Yes                             | CD          |
| CrossAssembly_<br>Contig8120  | <i>Autographiviridae</i> | Virulent  | Pseudomonadota | Yes                             | CD          |
| SampleH1_<br>Contig422        | <i>Microviridae</i>      | NA        | Bacteroidota   | Yes                             | CD          |
| CrossAssembly_<br>Contig1712  | Unclassified             | Temperate | Bacillota      | No                              | CD          |
| SampleCD10_<br>Contig6328     | NA                       | Virulent  | Bacillota      | No                              | CD          |

**Table S5 : Number of pairs of reads per sample.**

The number of pairs obtained after sequencing is indicated in the "Raw" column. The number of pairs remaining after quality-filtering, and removal of non-human reads is indicated in the "Clean and non-human" column. The samples with less than 100,000 pairs of clean, and non-human reads were excluded from the analysis. "CD" indicates patient with Crohn's disease and "H" indicates healthy subject

| SampleName          | Status  | Sample Type | Raw        | Clean and non-human |
|---------------------|---------|-------------|------------|---------------------|
| H1_F                | Healthy | Stool       | 4 557 777  | 3 302 598           |
| H2_F                | Healthy | Stool       | 5 141 556  | 3 538 237           |
| H3_F                | Healthy | Stool       | 4 575 463  | 3 314 041           |
| H4_F                | Healthy | Stool       | 5 006 463  | 3 702 841           |
| H5_F                | Healthy | Stool       | 6 630 408  | 4 868 696           |
| H6_F                | Healthy | Stool       | 6 043 597  | 4 533 278           |
| H7_F                | Healthy | Stool       | 149        | 113                 |
| H8_F                | Healthy | Stool       | 12 607 586 | 10 702 899          |
| H9_F                | Healthy | Stool       | 4 957 375  | 4 008 417           |
| H10_F               | Healthy | Stool       | 161        | 122                 |
| H11_F               | Healthy | Stool       | 47 423 047 | 36 124 946          |
| H12_F               | Healthy | Stool       | 3 848 503  | 3 021 191           |
| H13_F               | Healthy | Stool       | 3 944 094  | 3 101 396           |
| H14_F               | Healthy | Stool       | 10 220 371 | 8 099 646           |
| CD1_F               | Crohn   | Stool       | 3 398 455  | 2 610 231           |
| CD2_F               | Crohn   | Stool       | 11 438 302 | 8 205 616           |
| CD3_F               | Crohn   | Stool       | 27 092 512 | 19 524 928          |
| CD4_F               | Crohn   | Stool       | 18 270 751 | 12 128 024          |
| CD5_F               | Crohn   | Stool       | 8 453 588  | 5 729 131           |
| CD6_F               | Crohn   | Stool       | 4 522 582  | 3 789 808           |
| CD7_F               | Crohn   | Stool       | 2 985 683  | 2 478 116           |
| CD8_F               | Crohn   | Stool       | 10 219 909 | 8 279 831           |
| CD9_F               | Crohn   | Stool       | 7 091 001  | 5 360 552           |
| CD10_F              | Crohn   | Stool       | 9 143 203  | 7 378 428           |
| CD11_F              | Crohn   | Stool       | 9 290 609  | 7 084 801           |
| CD12_F              | Crohn   | Stool       | 6 350 692  | 5 222 735           |
| CD13_F              | Crohn   | Stool       | 7 983 876  | 6 487 386           |
| CD14_F              | Crohn   | Stool       | 636 447    | 498 993             |
| CD15_F              | Crohn   | Stool       | 3 500 715  | 2 724 997           |
| H1_B                | Healthy | Blood       | 25 145 743 | 6 790 645           |
| H2_B                | Healthy | Blood       | 13 872 445 | 5 336 467           |
| H3_B                | Healthy | Blood       | 17 469 863 | 6 122 420           |
| H4_B                | Healthy | Blood       | 16 038 090 | 3 433 116           |
| H5_B                | Healthy | Blood       | 19 342 807 | 5 840 315           |
| H6_B                | Healthy | Blood       | 1 916 528  | 185 563             |
| H7_B                | Healthy | Blood       | 2 347 924  | 837 299             |
| H8_B                | Healthy | Blood       | 2 733 222  | 788 996             |
| H9_B                | Healthy | Blood       | 2 689 347  | 723 438             |
| H10_B               | Healthy | Blood       | 2 486 126  | 573 092             |
| H11_B               | Healthy | Blood       | 1 397 921  | 160 240             |
| H12_B               | Healthy | Blood       | 3 711 044  | 691 480             |
| H13_B               | Healthy | Blood       | 2 312 559  | 68 548              |
| H14_B               | Healthy | Blood       | 5 506 340  | 2 713 132           |
| CD1_B               | Crohn   | Blood       | 25 941 062 | 8 696 199           |
| CD2_B               | Crohn   | Blood       | 14 183 825 | 8 720 837           |
| CD3_B               | Crohn   | Blood       | 29 669 303 | 14 833 794          |
| CD4_B               | Crohn   | Blood       | 20 129 214 | 11 955 938          |
| CD5_B               | Crohn   | Blood       | 16 967 073 | 10 236 927          |
| CD6_B               | Crohn   | Blood       | 4 631 975  | 1 917 021           |
| CD7_B               | Crohn   | Blood       | 2 048 220  | 12 333              |
| CD8_B               | Crohn   | Blood       | 7 197 457  | 3 434 820           |
| CD9_B               | Crohn   | Blood       | 6 813 381  | 3 293 988           |
| CD10_B              | Crohn   | Blood       | 6 542 891  | 3 338 429           |
| CD11_B              | Crohn   | Blood       | 7 374 010  | 2 778 364           |
| CD12_B              | Crohn   | Blood       | 9 614 014  | 4 117 958           |
| CD13_B              | Crohn   | Blood       | 5 606 138  | 2 207 758           |
| CD14_B              | Crohn   | Blood       | 5 555 652  | 2 052 908           |
| CD15_B              | Crohn   | Blood       | 8 436 207  | 4 380 873           |
| Microtube           |         |             | 5 242 956  | 2 930 415           |
| BloodCollectionTube |         |             | 10 853 654 | 4 427 872           |
